# Supplementary material for: Bone Microarchitecture and Strength Changes During Teriparatide and Zoledronic Acid Treatment in a Patient with Pregnancy and Lactation-Associated Osteoporosis with Multiple Vertebral Fractures
Source: PubMed Central journal article supplement (PMC10106348; doi:10.1007/s00223-023-01066-3), 2023-02-10
Supplement: 223_2023_1066_MOESM1_ESM.pdf [file 223_2023_1066_MOESM1_ESM.pdf]

Treurniet S, Bevers MSAM, et al. Bone microarchitecture and strength changes during teriparatide and zoledronic acid treatment in a patient with pregnancy and lactation associated osteoporosis with multiple vertebral fractures. *Calcified Tissue International*

**Online Resource 1:**

Panel with osteoporosis and osteogenesis imperfecta related genes used for the next generation sequencing (NGS).

---

Online Resource Table 1.1: NGS panel with osteoporosis and osteogenesis imperfecta related genes

---

*ALPL*  
*BMP1*  
*COL1A1*  
*COL1A2*  
*CREB3L1*  
*CRTAP*  
*FKBP10*  
*IFITM5*  
*LEPRE1*  
*LRP5*  
*PLOD2*  
*PLS3*  
*PPIB*  
*SERPINF1*  
*SERPINH1*  
*SP7*  
*TAPT1*  
*TMEM38B*  
*WNT1*

---
