# Supplementary material for: Bone Microarchitecture and Strength Changes During Teriparatide and Zoledronic Acid Treatment in a Patient with Pregnancy and Lactation-Associated Osteoporosis with Multiple Vertebral Fractures
Source: PubMed Central journal article supplement (PMC10106348; doi:10.1007/s00223-023-01066-3), 2023-02-10
Supplement: 223_2023_1066_MOESM2_ESM.pdf [file 223_2023_1066_MOESM2_ESM.pdf]

**Online Resource 2:** Bone geometry, bone mineral density, bone microarchitecture, and strength at the distal radius of the women with PLO assessed with high-resolution peripheral quantitative CT (HR-pQCT).

Online Resource Table 2.1: Geometry, BMD, and microarchitecture at the left distal radius of the women with PLO assessed with HR-pQCT.

|                                 | <b>Visit 1<br/>(7.3 mo PP)</b> | <b>Visit 2<br/>(12.1 mo PP)</b> |                             | <b>Visit 3<br/>(22.0 mo PP)</b> |                             | <b>Visit 4<br/>(28.2 mo PP)</b> |                             | <b>Visit 5<br/>(39.9 mo PP)</b> |                             |                     |
|---------------------------------|--------------------------------|---------------------------------|-----------------------------|---------------------------------|-----------------------------|---------------------------------|-----------------------------|---------------------------------|-----------------------------|---------------------|
|                                 | Value                          | Value                           | Change w.r.t<br>visit 1 (%) | Value                           | Change w.r.t<br>visit 1 (%) | Value                           | Change w.r.t<br>visit 1 (%) | Value                           | Change w.r.t<br>visit 1 (%) | Percentile<br>score |
| <i>Geometry</i>                 |                                |                                 |                             |                                 |                             |                                 |                             |                                 |                             |                     |
| Tb.Ar (mm <sup>2</sup> )        | 244.3                          | 244.1                           | -0.1                        | 242.7                           | -0.6                        | 242.9                           | -0.6                        | 242.2                           | -0.8                        | 75-90               |
| Ct.Ar (mm <sup>2</sup> )        | 44.1                           | 44.1                            | +0.2                        | 45.6                            | +3.4                        | 45.3                            | +2.9                        | 46.1                            | +4.6                        | 2-10                |
| <i>Volumetric density</i>       |                                |                                 |                             |                                 |                             |                                 |                             |                                 |                             |                     |
| Tt.BMD (mg HA/cm <sup>3</sup> ) | 166.2                          | 168.8                           | +1.6                        | 174.6                           | +5.1                        | 174.8                           | +5.2                        | 181.6                           | +9.3                        | <2                  |
| Tb.BMD (mg HA/cm <sup>3</sup> ) | 37.8                           | 39.1                            | +3.5                        | 41.2                            | +9.1                        | 41.4                            | +9.6                        | 46.5                            | +23.2                       | <2                  |
| Ct.BMD (mg HA/cm <sup>3</sup> ) | 913.6                          | 922.5                           | +1.0                        | 917.8                           | +0.5                        | 923.5                           | +1.1                        | 923.9                           | +1.1                        | 25-75               |
| <i>Microarchitecture</i>        |                                |                                 |                             |                                 |                             |                                 |                             |                                 |                             |                     |
| Tb.BV/TV (-)                    | 0.078                          | 0.081                           | +3.9                        | 0.080                           | +2.7                        | 0.088                           | +13.4                       | 0.093                           | +19.8                       | <2                  |
| Tb.N (mm <sup>-1</sup> )        | 0.498                          | 0.504                           | +1.2                        | 0.468                           | -5.9                        | 0.476                           | -4.4                        | 0.479                           | -3.7                        | <2                  |
| Tb.Th (mm)                      | 0.208                          | 0.209                           | +0.6                        | 0.213                           | +2.8                        | 0.219                           | +5.5                        | 0.223                           | +7.2                        | 25-75               |
| Tb.Sp (mm)                      | 2.030                          | 2.001                           | -1.5                        | 2.185                           | +7.6                        | 2.126                           | +4.7                        | 2.122                           | +4.5                        | <2*                 |
| Tb.1/N.SD (mm)                  | 1.727                          | 1.682                           | -2.6                        | 1.767                           | +2.3                        | 1.793                           | +3.8                        | 1.813                           | +4.9                        | <2*                 |
| Ct.Th (mm)                      | 0.735                          | 0.727                           | -1.0                        | 0.751                           | +2.2                        | 0.746                           | +1.6                        | 0.761                           | +3.6                        | 2-10                |
| Ct.Po (-)                       | 0.002                          | 0.002                           | +15.7                       | 0.001                           | -29.0                       | 0.002                           | +16.3                       | 0.002                           | -1.9                        | 25-75*              |

Tt: total, Tb: trabecular, Ct: cortical, Ar: area, BMD: bone mineral density, BV/TV: bone volume fraction, N: number, Th: thickness, Sp: separation, 1/N.SD: heterogeneity, Po: porosity.

Parameter values were obtained from the overlapping portions of the radius on the HR-pQCT scans between the visits after slice-matching (92% of 168 slices). The time between brackets indicates months postpartum at each visit. \* indicates parameters for which the percentile scores are reversed (e.g. a score of <2 represents a value larger, and thus worse, than the 98th percentile). Percentile scores are according to the normative dataset of Whittier DE, et al. 2020 *J Bone Miner Res* 35:2151-2158.

Online Resource Table 2.2: Strength at the left distal radius of the women with PLO estimated with micro-finite element analysis from HR-pQCT.

|                   | <b>Visit 1<br/>(7.3 mo PP)</b> |       | <b>Visit 2<br/>(12.1 mo PP)</b> |       | <b>Visit 3<br/>(22.0 mo PP)</b> |       | <b>Visit 4<br/>(28.2 mo PP)</b> |       | <b>Visit 5<br/>(39.9 mo PP)</b> |                     |
|-------------------|--------------------------------|-------|---------------------------------|-------|---------------------------------|-------|---------------------------------|-------|---------------------------------|---------------------|
|                   | Value                          | Value | Change w.r.t<br>visit 1 (%)     | Value | Change w.r.t<br>visit 1 (%)     | Value | Change w.r.t<br>visit 1 (%)     | Value | Change w.r.t<br>visit 1 (%)     | Percentile<br>score |
| <i>Strength</i>   |                                |       |                                 |       |                                 |       |                                 |       |                                 |                     |
| Failure load (kN) | 1.905                          | 1.966 | +3.2                            | 1.977 | +3.8                            | 2.088 | +9.6                            | 2.225 | +16.8                           | 2-10                |

Parameter values were obtained from the entire HR-pQCT scans without registration of the HR-pQCT scans between the visits. The time between brackets indicates months postpartum at each visit. Percentile scores are according to the normative dataset of Whittier DE, et al. 2020 J Bone Miner Res 35:2151-2158.
