# Supplementary material for: Bone Microarchitecture and Strength Changes During Teriparatide and Zoledronic Acid Treatment in a Patient with Pregnancy and Lactation-Associated Osteoporosis with Multiple Vertebral Fractures
Source: PubMed Central journal article supplement (PMC10106348; doi:10.1007/s00223-023-01066-3), 2023-02-10
Supplement: 223_2023_1066_MOESM3_ESM.pdf [file 223_2023_1066_MOESM3_ESM.pdf]

**Online Resource 3:**

Bone geometry, bone mineral density, bone microarchitecture, and strength at the distal tibiae of the women with PLO assessed with high-resolution peripheral quantitative CT (HR-pQCT).

Online Resource Table 3.1: Geometry, BMD, and microarchitecture at the left distal tibia of the women with PLO of the assessed with HR-pQCT.

|                                 | <b>Visit 1<br/>(7.3 mo PP)</b> | <b>Visit 2<br/>(12.1 mo PP)</b> |                             | <b>Visit 3<br/>(22.0 mo PP)</b> |                             | <b>Visit 4<br/>(28.2 mo PP)</b> |                             | <b>Visit 5<br/>(39.9 mo PP)</b> |                             |                     |
|---------------------------------|--------------------------------|---------------------------------|-----------------------------|---------------------------------|-----------------------------|---------------------------------|-----------------------------|---------------------------------|-----------------------------|---------------------|
|                                 | Value                          | Value                           | Change w.r.t<br>visit 1 (%) | Value                           | Change w.r.t<br>visit 1 (%) | Value                           | Change w.r.t<br>visit 1 (%) | Value                           | Change w.r.t<br>visit 1 (%) | Percentile<br>score |
| <i>Geometry</i>                 |                                |                                 |                             |                                 |                             |                                 |                             |                                 |                             |                     |
| Tb.Ar (mm <sup>2</sup> )        | 747.9                          | 742.2                           | -0.8                        | 743.0                           | -0.6                        | 742.2                           | -0.8                        | 738.5                           | -1.2                        | 90-98               |
| Ct.Ar (mm <sup>2</sup> )        | 83.7                           | 89.3                            | +6.7                        | 88.6                            | +5.9                        | 89.4                            | +6.8                        | 93.0                            | +11.2                       | 2-10                |
| <i>Volumetric density</i>       |                                |                                 |                             |                                 |                             |                                 |                             |                                 |                             |                     |
| Tt.BMD (mg HA/cm <sup>3</sup> ) | 148.2                          | 161.4                           | +8.9                        | 164.6                           | +11.1                       | 163.5                           | +10.3                       | 169.0                           | +14.0                       | <2                  |
| Tb.BMD (mg HA/cm <sup>3</sup> ) | 72.1                           | 80.1                            | +11.1                       | 82.8                            | +14.8                       | 82.6                            | +14.6                       | 83.0                            | +15.1                       | <2                  |
| Ct.BMD (mg HA/cm <sup>3</sup> ) | 855.8                          | 863.6                           | +0.9                        | 877.7                           | +2.6                        | 860.5                           | +0.6                        | 876.9                           | +2.5                        | <2                  |
| <i>Microarchitecture</i>        |                                |                                 |                             |                                 |                             |                                 |                             |                                 |                             |                     |
| Tb.BV/TV (-)                    | 0.123                          | 0.136                           | +10.5                       | 0.139                           | +13.6                       | 0.139                           | +13.6                       | 0.141                           | +14.7                       | <2                  |
| Tb.N (mm <sup>-1</sup> )        | 0.882                          | 0.887                           | +0.6                        | 0.879                           | -0.4                        | 0.882                           | ±0.0                        | 0.882                           | ±0.0                        | <2                  |
| Tb.Th (mm)                      | 0.237                          | 0.243                           | +2.5                        | 0.249                           | +5.0                        | 0.250                           | +5.6                        | 0.247                           | +4.4                        | 25-75               |
| Tb.Sp (mm)                      | 1.102                          | 1.079                           | -2.1                        | 1.095                           | -0.6                        | 1.096                           | -0.6                        | 1.084                           | -1.6                        | <2*                 |
| Tb.1/N.SD (mm)                  | 0.494                          | 0.482                           | -2.5                        | 0.530                           | +7.3                        | 0.525                           | +6.4                        | 0.510                           | +3.3                        | <2*                 |
| Ct.Th (mm)                      | 0.856                          | 0.911                           | +6.4                        | 0.904                           | +5.6                        | 0.901                           | +5.3                        | 0.946                           | +10.6                       | <2                  |
| Ct.Po (-)                       | 0.016                          | 0.024                           | +53.7                       | 0.019                           | +17.9                       | 0.020                           | +26.4                       | 0.026                           | +62.4                       | <2*                 |

Tt: total, Tb: trabecular, Ct: cortical, Ar: area, BMD: bone mineral density, BV/TV: bone volume fraction, N: number, Th: thickness, Sp: separation, 1/N.SD: heterogeneity, Po: porosity.

Parameter values were obtained from the overlapping portions of the tibiae on the HR-pQCT scans between the visits after slice-matching (95% of 168 slices). The time between brackets indicates months postpartum at each visit. \* indicates parameters for which the percentile scores are reversed (e.g. a score of <2 represents a value larger, and thus worse, than the 98th percentile). Percentile scores are according to the normative dataset of Whittier DE, et al. 2020 J Bone Miner Res 35:2151-2158.

Online Resource Table 3.2: Geometry, BMD, and microarchitecture at the right distal tibia of the women with PLO assessed with HR-pQCT.

|                                 | <b>Visit 1<br/>(7.3 mo PP)</b> | <b>Visit 2<br/>(12.1 mo PP)</b> |                             | <b>Visit 3<br/>(22.0 mo PP)</b> |                             | <b>Visit 4<br/>(28.2 mo PP)</b> |                             | <b>Visit 5<br/>(39.9 mo PP)</b> |                             |                     |
|---------------------------------|--------------------------------|---------------------------------|-----------------------------|---------------------------------|-----------------------------|---------------------------------|-----------------------------|---------------------------------|-----------------------------|---------------------|
|                                 | Value                          | Value                           | Change w.r.t<br>visit 1 (%) | Value                           | Change w.r.t<br>visit 1 (%) | Value                           | Change w.r.t<br>visit 1 (%) | Value                           | Change w.r.t<br>visit 1 (%) | Percentile<br>score |
| <i>Geometry</i>                 |                                |                                 |                             |                                 |                             |                                 |                             |                                 |                             |                     |
| Tb.Ar (mm <sup>2</sup> )        | 758.1                          | 747.7                           | -1.4                        | 741.3                           | -2.2                        | 739.3                           | -2.5                        | 737.4                           | -2.7                        | 90-98               |
| Ct.Ar (mm <sup>2</sup> )        | 81.4                           | 92.1                            | +13.2                       | 98.6                            | +21.2                       | 100.9                           | +23.9                       | 102.6                           | +26.1                       | 10-25               |
| <i>Volumetric density</i>       |                                |                                 |                             |                                 |                             |                                 |                             |                                 |                             |                     |
| Tt.BMD (mg HA/cm <sup>3</sup> ) | 131.4                          | 162.0                           | +23.2                       | 175.5                           | +33.5                       | 179.1                           | +36.3                       | 184.3                           | +40.2                       | <2                  |
| Tb.BMD (mg HA/cm <sup>3</sup> ) | 68.5                           | 80.7                            | +17.8                       | 83.9                            | +22.6                       | 85.3                            | +24.5                       | 87.2                            | +27.3                       | <2                  |
| Ct.BMD (mg HA/cm <sup>3</sup> ) | 746.6                          | 847.4                           | +13.5                       | 888.0                           | +18.9                       | 891.2                           | +19.4                       | 904.4                           | +21.1                       | 2-10                |
| <i>Microarchitecture</i>        |                                |                                 |                             |                                 |                             |                                 |                             |                                 |                             |                     |
| Tb.BV/TV (-)                    | 0.108                          | 0.133                           | +22.5                       | 0.137                           | +26.1                       | 0.138                           | +26.9                       | 0.140                           | +29.2                       | <2                  |
| Tb.N (mm <sup>-1</sup> )        | 0.816                          | 0.798                           | -2.1                        | 0.792                           | -2.9                        | 0.787                           | -3.5                        | 0.783                           | -4.0                        | <2                  |
| Tb.Th (mm)                      | 0.237                          | 0.254                           | +7.4                        | 0.256                           | +7.9                        | 0.257                           | +8.4                        | 0.259                           | +9.2                        | 25-75               |
| Tb.Sp (mm)                      | 1.204                          | 1.221                           | +1.4                        | 1.228                           | +2.0                        | 1.244                           | +3.3                        | 1.244                           | +3.4                        | <2*                 |
| Tb.1/N.SD (mm)                  | 0.560                          | 0.689                           | +23.2                       | 0.752                           | +34.3                       | 0.768                           | +37.1                       | 0.813                           | +45.2                       | <2*                 |
| Ct.Th (mm)                      | 0.869                          | 0.921                           | +6.0                        | 0.984                           | +13.2                       | 1.009                           | +16.0                       | 1.023                           | +17.7                       | 2-10                |
| Ct.Po (-)                       | 0.028                          | 0.018                           | -34.0                       | 0.015                           | -48.0                       | 0.015                           | -48.0                       | 0.015                           | -45.0                       | 10-25*              |

Tt: total, Tb: trabecular, Ct: cortical, Ar: area, BMD: bone mineral density, BV/TV: bone volume fraction, N: number, Th: thickness, Sp: separation, 1/N.SD: heterogeneity, Po: porosity.

Parameter values were obtained from the overlapping portions of the tibiae on the HR-pQCT scans between the visits after slice-matching (98% of 168 slices). The time between brackets indicates months postpartum at each visit. \* indicates parameters for which the percentile scores are reversed (e.g. a score of <2 represents a value larger, and thus worse, than the 98th percentile). Percentile scores are according to the normative dataset of Whittier DE, et al. 2020 J Bone Miner Res 35:2151-2158.

Online Resource Table 3.3: Strength at the left and right distal tibiae of the women with PLO estimated with micro-finite element analysis from HR-pQCT.

|                          | <b>Visit 1<br/>(7.3 mo PP)</b> |       |                             | <b>Visit 2<br/>(12.1 mo PP)</b> |                             | <b>Visit 3<br/>(22.0 mo PP)</b> |                             | <b>Visit 4<br/>(28.2 mo PP)</b> |                             | <b>Visit 5<br/>(39.9 mo PP)</b> |                             |
|--------------------------|--------------------------------|-------|-----------------------------|---------------------------------|-----------------------------|---------------------------------|-----------------------------|---------------------------------|-----------------------------|---------------------------------|-----------------------------|
|                          | Value                          | Value | Change w.r.t<br>visit 1 (%) | Value                           | Change w.r.t<br>visit 1 (%) | Value                           | Change w.r.t<br>visit 1 (%) | Value                           | Change w.r.t<br>visit 1 (%) | Value                           | Change w.r.t<br>visit 1 (%) |
| <i>Failure load (kN)</i> |                                |       |                             |                                 |                             |                                 |                             |                                 |                             |                                 |                             |
| Distal tibia left        | 4.988                          | 5.713 | +14.5                       | 5.847                           | +17.2                       | 5.834                           | +17.0                       | 6.042                           | +21.1                       | 6.653                           | +49.5                       |
| Distal tibia right       | 4.451                          | 6.014 | +35.1                       | 6.453                           | +45.0                       | 6.473                           | +45.4                       | 6.653                           | +49.5                       | 6.653                           | +49.5                       |

Parameter values were obtained from the entire HR-pQCT scans without registration of the HR-pQCT scans between the visits. The time between brackets indicates months postpartum at each visit. Percentile scores are according to the normative dataset of Whittier DE, et al. 2020 J Bone Miner Res 35:2151-2158.
