# Supplementary material for: Bone Microarchitecture and Strength Changes During Teriparatide and Zoledronic Acid Treatment in a Patient with Pregnancy and Lactation-Associated Osteoporosis with Multiple Vertebral Fractures
Source: PubMed Central journal article supplement (PMC10106348; doi:10.1007/s00223-023-01066-3), 2023-02-10
Supplement: 223_2023_1066_MOESM4_ESM.pdf [file 223_2023_1066_MOESM4_ESM.pdf]

Treurniet S, Bevers MSAM, et al. Bone microarchitecture and strength changes during teriparatide and zoledronic acid treatment in a patient with pregnancy and lactation associated osteoporosis with multiple vertebral fractures. *Calcified Tissue International*

**Online Resource 4:**

Bone geometry, BMD, and microarchitecture at the left distal radius and tibia of the mother of the women with PLO assessed with high-resolution peripheral quantitative CT (HR-pQCT).

Online Resource Table 4.1: Geometry, BMD, and microarchitecture at the left distal radius and tibia of the mother of the women with PLO assessed with HR-pQCT.

|                                 | Distal radius |                  | Distal tibia |                  |
|---------------------------------|---------------|------------------|--------------|------------------|
|                                 | Value         | Percentile score | Value        | Percentile score |
| <i>Geometry</i>                 |               |                  |              |                  |
| Tb.Ar (mm <sup>2</sup> )        | 308.7         | ≥98              | 899.4        | ≥98              |
| Ct.Ar (mm <sup>2</sup> )        | 42.3          | 2-10             | 76.0         | <2               |
| <i>Volumetric density</i>       |               |                  |              |                  |
| Tt.BMD (mg HA/cm <sup>3</sup> ) | 191.7         | <2               | 152.1        | <2               |
| Tb.BMD (mg HA/cm <sup>3</sup> ) | 116.0         | 25-75            | 106.6        | 2-10             |
| Ct.BMD (mg HA/cm <sup>3</sup> ) | 782.7         | <2               | 719.3        | <2               |
| <i>Microarchitecture</i>        |               |                  |              |                  |
| Tb.BV/TV (-)                    | 0.159         | 25-75            | 0.164        | 10-25            |
| Tb.N (mm <sup>-1</sup> )        | 1.217         | 25-75            | 1.139        | 25-75            |
| Tb.Th (mm)                      | 0.223         | 25-75            | 0.238        | 10-25            |
| Tb.Sp (mm)                      | 0.805         | 25-75*           | 0.855        | 25-75*           |
| Tb.1/N.SD (mm)                  | 0.317         | 25-75*           | 0.327        | 25-75*           |
| Ct.Th (mm)                      | 0.614         | <2               | 0.750        | <2               |
| Ct.Po (-)                       | 0.004         | 75-90*           | 0.022        | 25-75*           |

Tt: total, Tb: trabecular, Ct: cortical, Ar: area, BMD: bone mineral density, BV/TV: bone volume fraction, N: number, Th: thickness, Sp: separation, 1/N.SD: heterogeneity, Po: porosity.

\* indicates parameters for which the percentile scores are reversed (e.g. a score of <2 represents a value larger, and thus worse, than the 98th percentile). Percentile scores are according to the normative dataset of Whittier DE, et al. 2020 J Bone Miner Res 35:2151-2158.
